# Supplementary material for: Most Commonly-Consumed Food Items by Food Group, and by Province, in China: Implications for Diet Quality Monitoring
Source: MDPI journal article supplement (doi:10.3390/nu14091754), 2022-04-22
Supplement: s1 [file s1]

**Table S1.** Percent consuming of DQQ sentinel foods in each food group compared to all items, nationally and by province (%).

[illegible]

|                         |       |       |       |       |       |       |       |       |       |       |       |       |       |
|-------------------------|-------|-------|-------|-------|-------|-------|-------|-------|-------|-------|-------|-------|-------|
| SSBs (sodas) (group 28) | 100.0 | 100.0 | 100.0 | 100.0 | 100.0 | 100.0 | NA    | 100.0 | 100.0 | 100.0 | 100.0 | 100.0 | 100.0 |
| Fast food (group 29)    | 100.0 | 100.0 | 100.0 | NA    | 100.0 | 100.0 | 100.0 | NA    | NA    | 100.0 | NA    | NA    | 100.0 |

*Note:* SSB = sugar-sweetened beverages;

NA = not available;

Percentages between 90.0-95.0% are highlighted with a light shade, and percentages below 90.0% are highlighted with a dark shade.
